# Supplementary material for: A Muscarinic Antagonist Reduces Airway Inflammation and Bronchoconstriction Induced by Ambient Particulate Matter in a Mouse Model of Asthma
Source: MDPI journal article supplement (doi:10.3390/ijerph15061189), 2018-06-06
Supplement: s1 [file s1]

## Supplementary Material

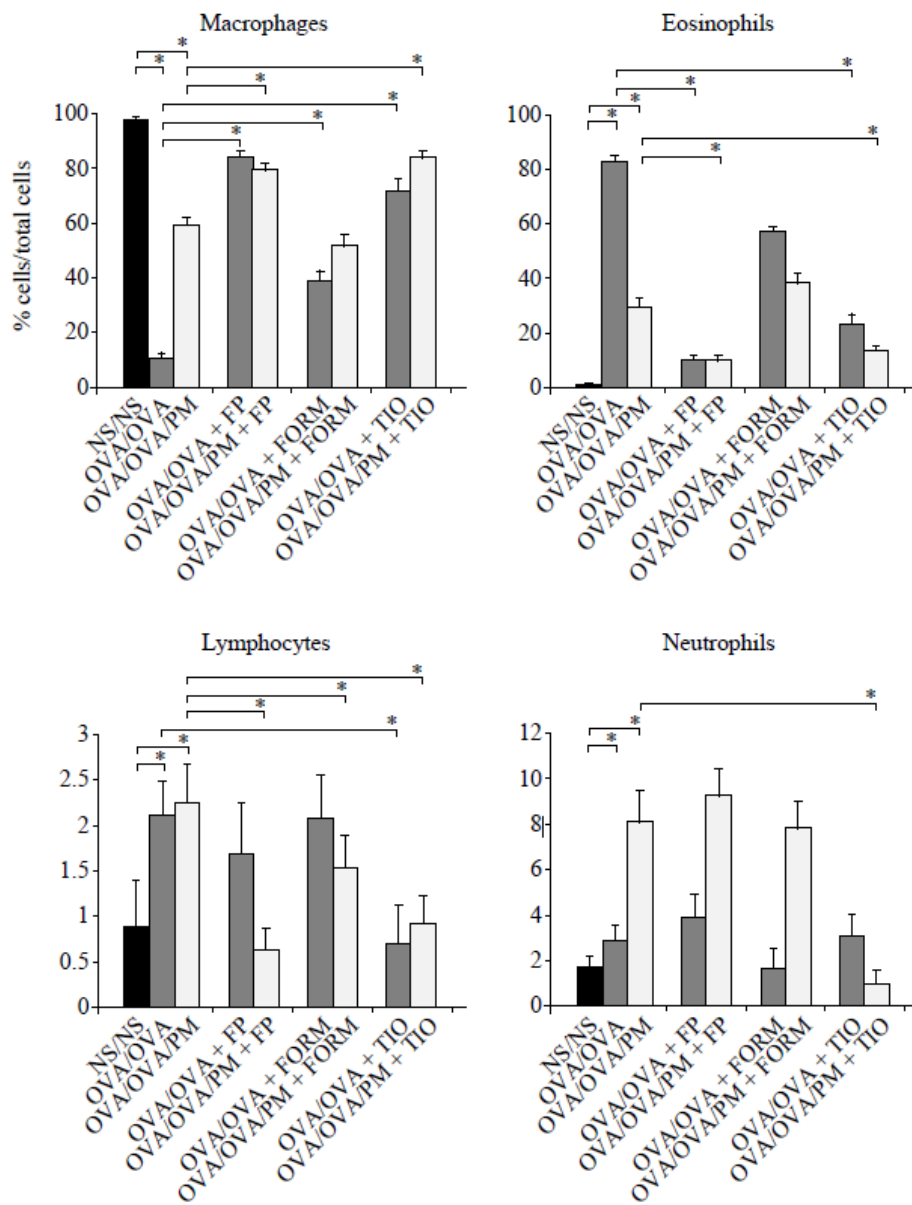

Figure S1: Percentage of macrophages, lymphocytes, neutrophils, and eosinophils in total cells in bronchoalveolar lavage fluid (BALF)
